29. Patterson SM, Cadogan CA, Kerse N *et al.* Interventions to improve the appropriate use of polypharmacy for older people. *Cochr Database Syst Rev* 2014; 10: CD008165.
30. Higgins J, Thompson SG, Spiegelhalter DJ. A re-evaluation of random-effects meta-analysis. *J R Stat Soc Ser A (Stat Soc)* 2009; 172: 137–59.
32. Bergkvist A, Midlov P, Hoglund P *et al.* A multi-intervention approach on drug therapy can lead to a more appropriate drug use in the elderly. *LIMM-Landskrona Integrated Medicines Management. J Eval Clin Pract* 2009; 15: 660–7.
33. Gillespie U, Alsaad A, Hammarlund-Udenaes M *et al.* Effects of pharmacists' interventions on appropriateness of prescribing and evaluation of the instruments' (MAI, STOPP and STARTs) ability to predict hospitalization-analyses from a randomized controlled trial. *PLoS ONE* 2013; 8: e62401.
34. Hellstrom LM, Bondesson A, Hoglund P *et al.* Impact of the Lund Integrated Medicines Management (LIMM) model on medication appropriateness and drug-related hospital revisits. *Eur J Clin Pharmacol* 2011; 67: 741–52.
35. Schmadre KE, Hanlon JT, Pieper CF *et al.* Effects of geriatric evaluation and management on adverse drug reactions and suboptimal prescribing in the frail elderly. *Am J Med* 2004; 116: 394–401.
46. Chan VT, Woo BK, Sewell DD *et al.* Reduction of suboptimal prescribing and clinical outcome for dementia patients in a senior behavioral health inpatient unit. *Int Psychogeriatr* 2009; 21: 195–9.
47. Lang PO, Vogt-Ferrier N, Hasso Y *et al.* Interdisciplinary geriatric and psychiatric care reduces potentially inappropriate prescribing in the hospital: interventional study in 150 acutely ill elderly patients with mental and somatic comorbid conditions. *J Am Med Dir Assoc* 2012; 13: 406.e401–e407.
48. University of York Centre for Reviews and Dissemination Akers J. Systematic reviews: CRD's guidance for undertaking reviews in health care. Centre for Reviews and Dissemination. York, UK: CRD, University of York, 2009.
49. Deeks JJ, Higgins J, Altman DG. Analysing Data and Undertaking Meta-Analyses. *Cochrane Handbook for Systematic Reviews of Interventions*. Cochrane Book Series. Chichester, UK: John Wiley & Sons, Ltd, 2008; 243–96.
50. Higgins JP, Thompson SG, Deeks JJ, Altman DG. Measuring inconsistency in meta-analyses. *BMJ* 2003; 327: 557–60.
54. Fox BI, Pedersen CA, Gumpert KF. ASHP national survey on informatics: Assessment of the adoption and use of pharmacy informatics in US hospitals—2013. *Am J Health Syst Pharm* 2015; 72: 636–55.
55. Pedersen CA, Schneider PJ, Scheckelhoff DJ. ASHP national survey of pharmacy practice in hospital settings: dispensing and administration-2011. *Am J Health Syst Pharm* 2012; 69: 768.

Received 24 July 2015; accepted in revised form 21 October 2015

*Age and Ageing* 2016; **45**: 209–216  
doi: 10.1093/ageing/afv192  
Published electronically 19 January 2016

© The Author 2016. Published by Oxford University Press on behalf of the British Geriatrics Society.  
This is an Open Access article distributed under the terms of the Creative Commons Attribution License (<http://creativecommons.org/licenses/by/4.0/>), which permits unrestricted reuse, distribution, and reproduction in any medium, provided the original work is properly cited.

## Global variation in grip strength: a systematic review and meta-analysis of normative data

RICHARD M. DODDS<sup>1,2</sup>, HOLLY E. SYDDALL<sup>1</sup>, RACHEL COOPER<sup>3</sup>, DIANA KUH<sup>3</sup>, CYRUS COOPER<sup>1,4,5</sup>, AVAN AIHIE SAYER<sup>1,2,4,6,7</sup>

<sup>1</sup>Medical Research Council Lifecourse Epidemiology Unit, University of Southampton, Southampton, UK

<sup>2</sup>Academic Geriatric Medicine, Faculty of Medicine, University of Southampton, Southampton, UK

<sup>3</sup>Medical Research Council Unit for Lifelong Health and Ageing at UCL, London, UK

<sup>4</sup>National Institute for Health Research Southampton Biomedical Research Centre, University of Southampton and University Hospital Southampton NHS Foundation Trust, Southampton, UK

<sup>5</sup>National Institute for Health Research Musculoskeletal Biomedical Research Unit, University of Oxford, Oxford, UK

<sup>6</sup>National Institute for Health Research Collaboration for Leadership in Applied Health Research and Care, Wessex, UK

<sup>7</sup>Newcastle University Institute for Ageing and Institute of Health and Society, Newcastle University, Newcastle, UK

Address correspondence to: R. M. Dodds. Tel: (+44) 2380 777624; Fax: (+44) 2380 704021. Email: [rd@mrc.soton.ac.uk](mailto:rd@mrc.soton.ac.uk)

### Abstract

**Background:** weak grip strength is a key component of sarcopenia and is associated with subsequent disability and mortality. We have recently established life course normative data for grip strength in Great Britain, but it is unclear whether the cut

points we derived for weak grip strength are suitable for use in other settings. Our objective was to investigate differences in grip strength by world region using our data as a reference standard.

**Methods:** we searched MEDLINE and EMBASE for reporting age- and gender-stratified normative data for grip strength. We extracted each item of normative data and converted it on to a Z-score scale relative to our British centiles. We performed meta-regression to pool the Z-scores and compare them by world region.

**Findings:** our search returned 806 abstracts. Sixty papers met inclusion criteria and reported on 63 different samples. Seven UN regions were represented, although most samples ( $n = 44$ ) were based in developed regions. We extracted 726 normative data items relating to 96,537 grip strength observations. Normative data from developed regions were broadly similar to our British centiles, with a pooled Z-score 0.12 SDs (95% CI: 0.07, 0.17) above the corresponding British centiles. By comparison, normative data from developing regions were clearly lower, with a pooled Z-score of  $-0.85$  SDs (95% CI:  $-0.94$ ,  $-0.76$ ).

**Interpretation:** our findings support the use of our British grip strength centiles and their associated cut points in consensus definitions for sarcopenia and frailty across developed regions, but highlight the need for different cut points in developing regions.

**Keywords:** *sarcopenia, grip strength, international, systematic review, old people*

## Introduction

Weak grip strength is linked to a range of health outcomes including higher all-cause mortality rates [1–3] and morbidity [4, 5], as well as forming a key part of sarcopenia [6] and frailty [7] phenotypes. As such, there is growing interest in its assessment in clinical settings. We have recently established life course normative data for grip strength from 12 British studies, allowing an individual's strength to be assessed in terms of what would be expected for their gender and age [8]. Cut points for weak grip strength allow healthcare workers to easily identify older people who may benefit from further assessment: using a T-score approach with our normative data, we proposed cut points of 16 kg in females and 27 kg in males. These values are similar to those from the FNIH Sarcopenia Project (16 and 26 kg) based on the presence of mobility impairment in a sample combining several US and European cohorts [9]. This raises the question of whether our normative data are also applicable in US and European settings, as well as in other world regions. There exists a growing literature of normative data studies for grip strength covering different stages of the life course in different countries [10–15]. The objective of this paper was therefore to use a systematic review and meta-analysis to investigate differences in grip strength by world region, using our recently published life course normative data as a reference.

## Methods

### Literature search

We carried out a systematic review following the guidance in the PRISMA statement [16]. We searched the databases MEDLINE (including in-process citations) and EMBASE for English language publications up to August 2014 (for full search strategy, see Supplementary data, Appendix 2, available in *Age and Ageing* online). Eligible studies were those published from 1980 onwards reporting normative data for

grip strength. We included studies based on samples of the general population and excluded those based on specific occupational or illness groups. We required studies to have reported their normative data in tabular form stratified by gender and age (across at most 15-year age bands) and to have included a mean and a standard error (or values from which one could be calculated) for each stratum.

### Data extraction

We extracted information about each study. In terms of the sample used, this included the country, level (national, regional, local or based in a single facility), the sample size and whether a sampling frame or a convenience sampling approach was used. We assumed a convenience sample had been used when the sample type was not described. In terms of the protocol used to measure grip strength, this included the dynamometer, measurement position (seated or standing), the hand(s) tested and the number of trials along with the summary value reported (mean or maximum).

For each age and gender stratum, we extracted the mean value for grip strength along with its standard error or equivalent values from which one could be calculated (the formulae used for these calculations are shown in Supplementary data, Appendix 3a, available in *Age and Ageing* online). We extracted the maximum value from both hands if this was reported; otherwise, we extracted the maximum or mean for the right or dominant side, as available in the paper. We converted grip strength values in pounds force and Newtons to kilograms force [17].

### Statistical analyses

We produced summary charts of the extracted normative data for males and females. As described in the results section, these data typically followed the same overall pattern across the life course as our British normative values. We therefore chose to use our British values as a reference, and

converted the normative data items that we extracted from existing studies to mean Z-scores prior to further analyses. To do this, we calculated the difference between the mean from each normative data item and the mean from our British values for an equivalent age range, divided by the SD from our British values. Where a normative data item referred to a range of ages, we calculated the equivalent pooled mean and standard deviation [18] across the same age range in our British values and used these as the basis for Z-scores.

We used random-effects meta-regression in Stata version 13 [19] to pool the grip strength Z-scores and to investigate the associations with world region and aspects of measurement protocol. We assumed a coefficient of variation (the SD/mean) for grip strength of 0.25 (as seen in our British normative data) such that a difference of 0.4 on the Z-score scale is equivalent to a 10% difference in grip strength mean values (see Supplementary data, Appendix 3b, available in *Age and Ageing* online). We classified countries into those in developed and developing regions using groupings provided by the United Nations Statistics Division [20]. In terms of measurement protocol, we classified type of dynamometer as hydraulic (divided into the commonly used Jamar hydraulic dynamometer [21] or other hydraulic dynamometers), electronic or not specified. We also compared results from studies which had measured grip in the seated or standing positions, those which had reported values from one or both hands and those which showed the maximum or mean value from repeated trials.

## Results

### Study selection and characteristics

We screened 806 abstracts and assessed 96 papers for eligibility (for flow diagram, see Supplementary data, Appendix 4, available in *Age and Ageing* online). Sixty papers met inclusion criteria [10, 11, 13–15, 22–76]. Two papers included results for two samples [42, 62] and one paper provided results for two dynamometers [46]; hence the total number of samples for analysis was 63. A summary of their characteristics is given in Table 1, and a full list of included papers is provided in Supplementary data, Appendix 5, available in *Age and Ageing* online. The samples were based across 27 countries in seven UN regions, with a majority in developed regions ( $n = 44$ ) as shown in Figure 1. The normative data covered childhood, adolescence and adulthood in four regions (Africa, Asia excluding Japan, Europe and Northern America). The data in the other three regions (Americas excluding Northern America, Australia and Japan) only covered adulthood. There were no samples from New Zealand (normally grouped with Australia in the UN classification).

### Relationship between world region and grip strength

We extracted 726 normative data items relating to 96,537 grip strength observations. We excluded eight normative data items outside the age range of our British normative data

**Table 1.** Characteristics of included samples, by developed status of region

| Characteristic                      | Developed status, $n$ (%) <sup>a</sup> |                           |                   |
|-------------------------------------|----------------------------------------|---------------------------|-------------------|
|                                     | Developing<br>( $N = 19$ )             | Developed<br>( $N = 44$ ) | Both ( $N = 63$ ) |
| .....                               |                                        |                           |                   |
| Year of publication                 |                                        |                           |                   |
| 1985–94                             | 2 (11)                                 | 6 (14)                    | 8 (13)            |
| 1995–2004                           | 2 (11)                                 | 15 (34)                   | 17 (27)           |
| 2005–14                             | 15 (79)                                | 23 (52)                   | 38 (60)           |
| Sample level                        |                                        |                           |                   |
| National                            | 1 (5)                                  | 6 (14)                    | 7 (11)            |
| Regional                            | 3 (16)                                 | 10 (23)                   | 13 (21)           |
| Local/facility/NS                   | 15 (79)                                | 28 (64)                   | 43 (68)           |
| Sample type                         |                                        |                           |                   |
| Sampling frame                      | 3 (16)                                 | 14 (32)                   | 17 (27)           |
| Convenience/NS                      | 16 (84)                                | 30 (68)                   | 46 (73)           |
| Sample size <sup>b</sup>            |                                        |                           |                   |
| Median (IQR)                        | 435 (120, 1,005)                       | 514 (270, 1,479)          | 498 (225, 1,119)  |
| Stage of life course                |                                        |                           |                   |
| Child/adol. ≤18 years               | 3 (16)                                 | 11 (25)                   | 14 (22)           |
| Adults all <50 years                | 3 <sup>c</sup> (16)                    | 2 (5)                     | 5 (8)             |
| Adults all ≥50 years                | 3 (16)                                 | 9 (20)                    | 12 (19)           |
| Adults, both ages                   | 8 (42)                                 | 20 <sup>d</sup> (45)      | 28 (44)           |
| All stages above                    | 2 (11)                                 | 2 (5)                     | 4 (6)             |
| Dynamometer                         |                                        |                           |                   |
| Jamar hydraulic                     | 8 (42)                                 | 23 (52)                   | 31 (49)           |
| Other—hydraulic                     | 6 (32)                                 | 12 (27)                   | 18 (29)           |
| Electronic                          | 3 (16)                                 | 6 (14)                    | 9 (14)            |
| NS                                  | 2 (11)                                 | 3 (7)                     | 5 (8)             |
| Position                            |                                        |                           |                   |
| Seated                              | 10 (53)                                | 32 (73)                   | 42 (67)           |
| Standing                            | 6 (32)                                 | 7 (16)                    | 13 (21)           |
| NS                                  | 3 (16)                                 | 5 (11)                    | 8 (13)            |
| Hand(s) described in extracted data |                                        |                           |                   |
| Right/dominant                      | 18 (95)                                | 32 (72)                   | 50 (79)           |
| Non-dominant                        | 0 (0)                                  | 4 (9)                     | 4 (6)             |
| Both                                | 1 (5)                                  | 8 (18)                    | 9 (14)            |
| Summary of trials                   |                                        |                           |                   |
| Maximum                             | 11 (58)                                | 22 (50)                   | 33 (52)           |
| Mean                                | 6 (32)                                 | 13 (30)                   | 19 (30)           |
| NS                                  | 2 (11)                                 | 9 (20)                    | 11 (17)           |

NS, not specified.

<sup>a</sup>Unless otherwise specified. Please note all percentages are rounded to the nearest whole percentage point, and hence, the total for each group may not equal 100.

<sup>b</sup>This refers to the sample size for the age ranges extracted from each paper. This value is smaller than the sample size provided in papers which had included open-ended age ranges such as 75+ years.

<sup>c</sup>The paper by Chatterjee *et al.* [29] had an age range of 10–49 years, and for the purpose of this table, we classed this as a young adult paper.

<sup>d</sup>The paper by Backman *et al.* [24] had an age range of 17–70 years, and we classed this as adults, both ages.

(younger than 4 years or older than 90 years), leaving 718 for analyses. As shown in Figure 2, we saw a similar pattern of mean grip strength across the life course in both males and females to that from our British normative values: an increase to peak in early adult life, broad maintenance through to midlife and decline from midlife onwards. There was separation between data items from developed and developing regions. As shown in Table 2, Data items from developed regions were typically similar to those in Britain, with a

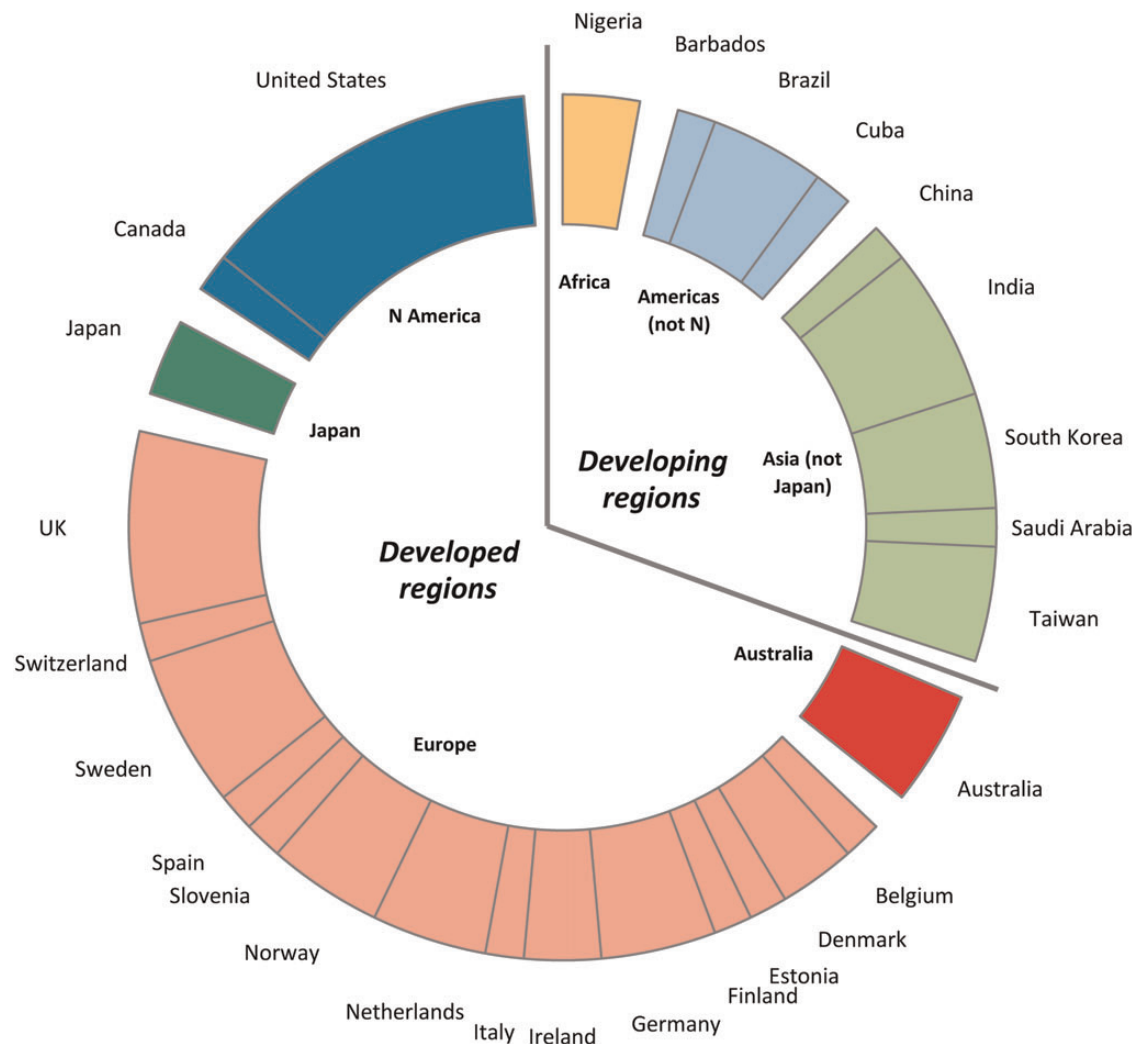

**Figure 1.** Country setting of included samples by UN region. The chart shows the country setting of the 63 included samples, grouped by UN region.

**Table 2.** Pooled Z-scores by region status and individual regions

| Classification                                                                       | N <sup>a</sup> | Pooled Z-score <sup>b</sup> | (95% CI)       | Adjusted R <sup>2c</sup> |
|--------------------------------------------------------------------------------------|----------------|-----------------------------|----------------|--------------------------|
| Overall                                                                              | 63             | −0.09                       | (−0.14, −0.04) | –                        |
| UN region status                                                                     |                |                             |                |                          |
| Developing                                                                           | 19             | −0.85                       | (−0.94, −0.76) | 34.1%                    |
| Developed                                                                            | 44             | 0.12                        | (0.07, 0.17)   |                          |
| UN world region (with references shown)                                              |                |                             |                |                          |
| Developing regions                                                                   |                |                             |                | 36.3%                    |
| Africa [13, 25]                                                                      | 2              | −1.34                       | (−1.57, −1.11) |                          |
| Americas excluding N America [28, 62, 63, 71]                                        | 5              | −0.80                       | (−0.97, −0.63) |                          |
| Asia excluding Japan [11, 23, 29, 30, 42, 67, 69, 72, 74, 75]                        | 12             | −0.74                       | (−0.86, −0.62) |                          |
| Developed regions                                                                    |                |                             |                |                          |
| Australia [46, 47]                                                                   | 3              | −0.01                       | (−0.20, 0.18)  |                          |
| Europe [10, 14, 15, 22, 24, 31–33, 35, 37, 38, 43–45, 50, 51, 53–61, 66, 68, 70, 73] | 29             | 0.13                        | (0.07, 0.19)   |                          |
| Japan [64, 76]                                                                       | 2              | −0.13                       | (−0.40, 0.14)  |                          |
| Northern America [26, 27, 34, 36, 39–41, 48, 49, 65]                                 | 10             | 0.16                        | (0.04, 0.28)   |                          |

Results shown are from separate meta-regression models of all 718 normative data items, with model term(s) those for each classification shown.

<sup>a</sup>N, number of samples contributing to each subgroup.

<sup>b</sup>The Z-score scale is the number of SDs above the equivalent values from our British centiles. Each pooled Z-score (and 95% CI) is from a meta-regression model combining the Z-scores for all the normative data items from the subgroup shown.

<sup>c</sup>The adjusted R<sup>2</sup> is the proportion of variance between each item of normative data explained by each of the two classifications.



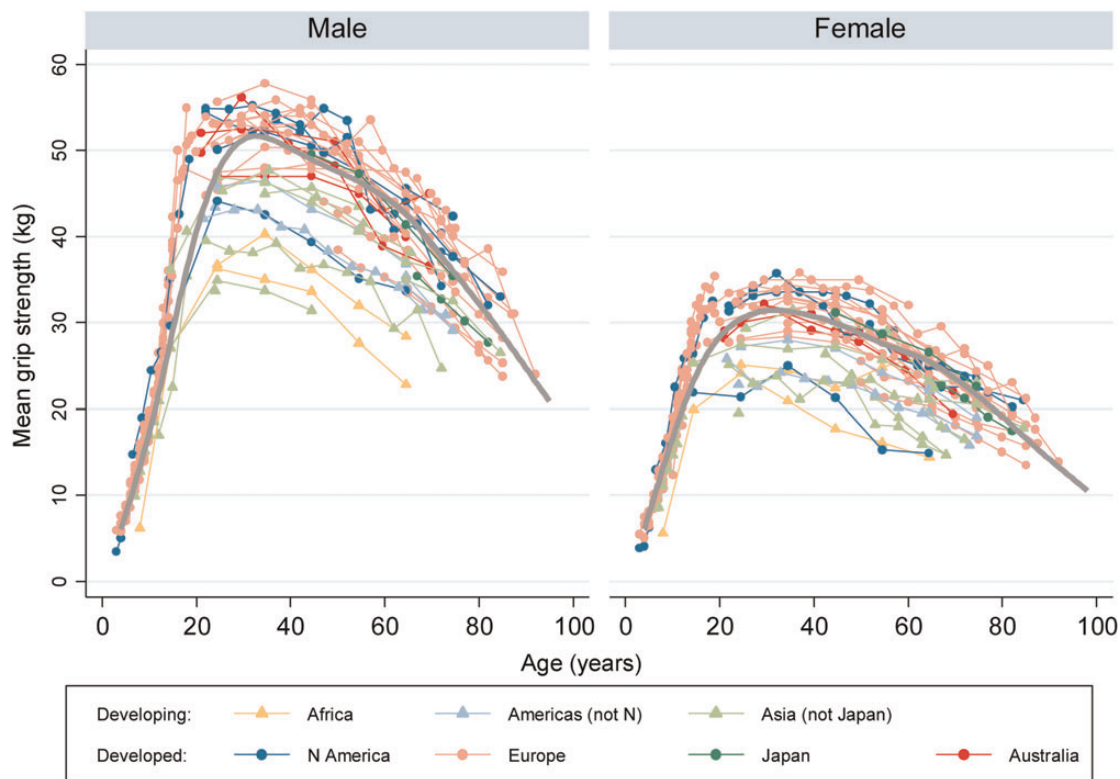

**Figure 2.** Grip strength mean values from included samples, by UN region. Each point represents the mean value of grip strength for each item of normative data, plotted against the mid-point of the age range it relates to. Values from the same sample are connected. Data from developing and developed regions are shown with triangles and circles, respectively. For comparison, the grey curve shows the mean values from our normative data for 12 British studies.

pooled Z-score of 0.12 SDs (95% CI: 0.07, 0.17) above the equivalent British centiles. Data items from developing regions were typically lower, with a pooled Z-score of  $-0.85$  SDs (95% CI:  $-0.94$ ,  $-0.76$ ). To illustrate these values, at age 30 in British males, we previously found mean grip strength to be 51.6 (9.6) kg. At this age, the pooled Z-scores from developed and developing regions would equate to mean grip strengths of 52.8 and 43.4 kg, respectively. The pooled results within each of the seven UN regions were consistent with this pattern although the number of samples contributing to three regions (Africa, Australia and Japan) was low.

### Measurement protocol and reporting of normative data

The protocol used to measure grip strength and the reporting of normative data varied between the included papers. The majority had used the Jamar hydraulic ( $n = 31$ ) or other types of hydraulic dynamometer ( $n = 18$ ), with measurement in the seated position ( $n = 42$ ). Most studies ( $n = 54$ ) presented grip strength normative data for each hand separately (and we extracted data for either the right or dominant hand in such cases). The summary of repeated trials varied: the maximum ( $n = 33$ ), mean ( $n = 19$ ) or not specified ( $n = 11$ ). Meta-regression analyses (results not shown) did not find

evidence of a difference in mean grip strength Z-scores in terms of these protocol and reporting factors.

## Discussion

### Main findings

We carried out a systematic literature review of published normative data for grip strength. We saw that the normative data followed the same pattern across the life course as our previous British normative data, with an increase across childhood to peak in early adult life, broad maintenance through to midlife and decline from midlife onwards. There was clear evidence that average grip strength measurements are substantially lower in developing compared with developed world regions. Our findings are important since they highlight how consensus definitions of sarcopenia and frailty may need different cut points for grip strength for different geographical regions.

### Comparison with other studies

There are several possible explanations for the difference in normative data for grip strength between regions, including differences in body size and composition including mean height and weight. We were not able to test this as the studies did not present age- and gender-stratified height

and weights alongside those for grip strength. Koopman *et al.* [77] compared grip strength between samples in Ghana and the Netherlands across ages 50–80 years: those in the Netherlands were stronger on average than those in Ghana, but they were also taller and had higher BMI. To take account of these differences in body size, the authors used linear regression to predict age- and gender-specific grip strength in the Ghanaian sample assuming they had the same mean height and BMI as their Dutch counterparts. This showed that differences in body size largely explained the differences in grip strength that had been observed. Clearly these differences in height and weight between Ghana and the Netherlands are likely to be explained by a wide range of factors including early growth, nutrition and genetic factors, many of which may also account for the differences seen in grip strength.

We are not aware of other studies that have compared normative data for grip strength between world regions. Two of the papers from our literature search provided normative values from two samples: Kaur *et al.* [42] from rural and urban Haryana in North India, and Rodrigues-Barbosa *et al.* [62] from Barbados and Cuba. In neither paper had the authors tested for differences between the two samples. We found no evidence of a marked or statistically significant difference when we did this by pooling the Z-scores from each sample (results not shown). Bohannon *et al.* [12] combined normative data for grip strength from 12 studies from countries in developed regions: the USA, Canada, UK, Sweden and Australia in order to produce normative data for the Jamar dynamometer for ages 20–75. They did not find evidence of heterogeneity between the 12 studies that they combined. This is in keeping with our results of similar pooled Z-scores from developed regions.

We are also not aware of other studies that have compared sets of normative data for grip strength collected with different measurement protocols. We previously found that 12 British studies using a range of dynamometers in the seated and standing positions produced acceptably similar normative data [8], and our present finding of no marked difference in the pooled Z-scores of other normative data papers by protocol factors is consistent with this. Several studies have examined whether values from repeat measurements of grip strength using different dynamometers [78–80] or a change of position [81–83] are consistent. The findings have varied, although overall these studies support using a consistent protocol for repeat measurements of an individual's grip strength where possible. We also again highlight the importance of recent calls for standardisation in future data collections [21, 84].

### Clinical relevance of findings

As consensus definitions for sarcopenia and frailty are implemented in clinical practice, the question of whether a single set of normative data and cut points for grip strength can be applied across a range of different countries is an important one. For example, we previously used a T-score approach

[85] to produce cut points from our British normative data of 27 kg in males and 16 kg in females, and we estimated that ~25% of individuals aged 80 were at or below these levels [8]. If the same cut-offs were applied to a hypothetical population with a mean grip strength of 0.85 SDs lower than our British norms, as seen in our pooled results for developing regions, then the prevalence at age 80 would increase to ~60%. This suggests that the cut points from our British normative data may not be specific enough in developing regions. Indeed, the potential need for specific cut points for the Asia region, as well as the need to consider heterogeneity between countries in this region, has recently been recognised [86, 87]; a situation analogous to the use of region-specific BMD thresholds for fracture risk prediction in osteoporosis. It would be helpful to investigate prospective associations between grip strength and outcomes in a region-specific fashion [2], in order to determine optimum cut points for use in clinical practice.

A related question is whether normative data and cut points need to be stratified by height and ethnicity, and whether these factors would explain the regional differences that we observed. As described earlier, differences in height (and BMI) appeared to account for differences in grip strength between samples from Ghana and the Netherlands [77]. Other studies in the USA and the Netherlands have examined differences in grip strength by ethnicity [88–90]. The combination of data from cohorts based in different regions would allow the independent contributions of height, ethnicity and region to the global variation in grip strength to be examined.

We searched for papers containing normative data on grip strength from samples of the general population. The results of this review demonstrate that the measurement of grip strength has been undertaken in such samples in many countries, suggesting that it is acceptable for research participants and data collection teams. There is growing interest in the assessment of grip strength of individuals in hospitals and care homes [91–95] although to date there are few examples of age- and gender-stratified normative data in this diverse range of settings.

### Strengths and limitations

The systematic literature review had some limitations. In terms of the literature search, it is possible that there are other examples of normative data for grip strength in journals not indexed by MEDLINE or EMBASE, or those not published in medical journals, such as in government reports. We also found 12 papers with data not presented in the correct form. It is possible that contacting the authors of these papers would have allowed us to include them. However, we do not believe that the inclusion of additional papers would substantially alter our results. Also many of the included papers were based on small convenience samples of the local area or one facility. This may have led to pooled estimates for some countries which were not representative of the population as a whole although we did use random-effects meta-regression which anticipated variance between estimates and

weighted them according to their standard errors. Finally as stated above, we have not been able to explore to what extent factors such as height and ethnic group account for the differences in grip strength between regions.

This review also had many strengths. We undertook a comprehensive literature search that yielded papers on grip strength from all world regions. There was considerable variation in how papers reported their normative data, such as the age ranges and descriptive statistics used. We undertook necessary data management and then used our British norms as a reference to generate Z-scores for inclusion in meta-regression analyses. As far as we are aware, such an approach has not been used before for grip strength.

## Conclusions

There is an urgent need for widely applicable thresholds for grip strength in men and in women. This systematic review found that normative data from developed regions were similar to those described in our recent British centiles, whereas those from developing regions were clearly lower. This supports the use of our cut points (or those from the FNIH Sarcopenia project) in consensus definitions for sarcopenia and frailty across Europe, Northern America, Australia and Japan. In Asia, the rest of the Americas and Africa, consideration will need to be given to region-specific cut points.

## Key points

- Weak grip strength is a key component of sarcopenia and is associated with subsequent disability and mortality.
- We recently used data from British studies to develop cut points for grip strength of 16 and 27 kg in females and males, respectively.
- We examined global variation in grip strength and saw clear separation between mean values in developed and developing regions.
- Our findings suggest the need for region-specific cut points for grip strength in developing regions.

## Supplementary data

Supplementary data mentioned in the text are available to subscribers in *Age and Ageing* online.

## Conflicts of interest

None declared.

## Funding

This work was supported by the Wellcome Trust (Fellowship to R.M.D., grant number WT099055AIA); and the UK Medical Research Council (D.K. and R.C., programme code MC\_UU\_12019/4). The funders had no role in the design,

execution, analysis and interpretation of data, or writing of the study.

## References

The very long list of references supporting this review has meant that only the most important are listed here and are represented by bold type throughout the text. The full list of references is available as Supplementary data, Appendix 1, available in *Age and Ageing* online.

1. Sayer AA, Kirkwood TBL. Grip strength and mortality: a bio-marker of ageing? *Lancet* 2015; 386: 226–7.
2. Leong DP, Teo KK, Rangarajan S *et al.* Prognostic value of grip strength: findings from the Prospective Urban Rural Epidemiology (PURE) study. *Lancet* 2015; 386: 266–73.
3. Cooper R, Kuh D, Hardy R, Mortality Review Group. Objectively measured physical capability levels and mortality: systematic review and meta-analysis. *BMJ* 2010; 341: c4467.
4. Cooper R, Kuh D, Cooper C *et al.* Objective measures of physical capability and subsequent health: a systematic review. *Age Ageing* 2011; 40: 14–23.
5. Cheung C-L, Nguyen U-SDT, Au E, Tan KCB, Kung AWC. Association of handgrip strength with chronic diseases and multimorbidity. *Age (Dordr)* 2013; 35: 929–41.
6. Aihie Sayer A, Robinson SM, Patel HP, Shavlakadze T, Cooper CGrounds MD. New horizons in the pathogenesis, diagnosis and management of sarcopenia. *Age Ageing* 2013; 42: 145–50.
7. Fried LP, Tangen CM, Walston J *et al.* Frailty in older adults: evidence for a phenotype. *J Gerontol A Biol Sci Med Sci* 2001; 56A: M146–56.
8. Dodds RM, Syddall HE, Cooper R *et al.* Grip strength across the life course: normative data from twelve British studies. *PLoS One* 2014; 9: e113637.
9. Alley DE, Shardell MD, Peters KW *et al.* Grip strength cut-points for the identification of clinically relevant weakness. *J Gerontol A Biol Sci Med Sci* 2014; 69: 559–66.
10. Häger-Ross C, Rösblad B. Norms for grip strength in children aged 4–16 years. *Acta Paediatr* 2002; 91: 617–25.
11. Almuzaini KS. Muscle function in Saudi children and adolescents: relationship to anthropometric characteristics during growth. *Pediatr Exerc Sci* 2007; 19: 319–33.
12. Bohannon RW, Peolsson A, Massy-Westropp N, Desrosiers J, Bear-Lehman J. Reference values for adult grip strength measured with a Jamar dynamometer: a descriptive meta-analysis. *Physiother* 2006; 92: 11–5.
13. Adedoyin RA, Ogundapo FA, Mbada CE *et al.* Reference values for handgrip strength among healthy adults in Nigeria. *Hong Kong Physiother J* 2009; 27: 21–9.
14. Frederiksen H, Hjelmberg J, Mortensen J, McGue M, Vaupel JWChristensen K. Age trajectories of grip strength: cross-sectional and longitudinal data among 8,342 Danes aged 46 to 102. *Ann Epidemiol* 2006; 16: 554–62.
15. Spruit MA, Sillen MJH, Groenen MTJ, Wouters EFM, Franssen FME. New normative values for handgrip strength: results from the UK Biobank. *JAMDA* 2013; 14: 775 e5–11.
21. Roberts HC, Denison HJ, Martin HJ *et al.* A review of the measurement of grip strength in clinical and epidemiological studies: towards a standardised approach. *Age Ageing* 2011; 40: 423–9.
77. Koopman JJE, van Bodegom D, van Heemst D, Westendorp RGJ. Handgrip strength, ageing and mortality in rural Africa. *Age Ageing* 2015; 44: 465–70.

83. Liao W-C, Wang C-H, Yu S-Y, Chen L-Y, Wang C-Y. Grip strength measurement in older adults: a comparison of three testing positions. *Austr J Ageing* 2014; 33: 278–82.
84. Reuben DB, Magasi S, McCreath HE *et al*. Motor assessment using the NIH Toolbox. *Neurology* 2013; 80: S65–75.
85. Bohannon RW, Magasi S. Identification of dynapenia in older adults through the use of grip strength *t*-scores. *Muscle Nerve* 2015; 51: 102–5.
86. Woo J, Arai H, Ng TP *et al*. Ethnic and geographic variations in muscle mass, muscle strength and physical performance measures. *Eur Geriatr Med* 2014; 5: 155–64.
87. Chen LK, Liu LK, Woo J *et al*. Sarcopenia in Asia: consensus report of the Asian working group for sarcopenia. *JAMDA* 2014; 15: 95–101.
88. Haas SA, Krueger PM, Rohlfen L. Race/ethnic and nativity disparities in later life physical performance: the role of health and socioeconomic status over the life course. *J Gerontol Ser B Psychol Sci Soc Sci* 2012; 67: 238–48.
89. Van der Kooi A-LLE, Snijder MB, Peters RJG, van Valkengoed IGM. The association of handgrip strength and type 2 diabetes mellitus in six ethnic groups: an analysis of the HELIUS study. *PLoS One* 2015; 10: e0137739.
90. Araujo AB, Chiu GR, Kupelian V *et al*. Lean mass, muscle strength, and physical function in a diverse population of men: a population-based cross-sectional study. *BMC Public Health* 2010; 10: 508.
91. Kerr A, Syddall HE, Cooper C, Turner GF, Briggs RS, Aihie Sayer A. Does admission grip strength predict length of stay in hospitalised older patients? *Age Ageing* 2006; 35: 82–4.
92. García-Peña C, García-Fabela LC, Gutiérrez-Robledo LM, García-González JJ, Arango-Lopera VE, Pérez-Zepeda MU. Handgrip strength predicts functional decline at discharge in hospitalized male elderly: a hospital cohort study. *PLoS One* 2013; 8: e69849.
93. Guerra RS, Fonseca I, Pichel F, Restivo MT, Amaral TF. Handgrip strength and associated factors in hospitalized patients. *J Parenter Enter Nutr* 2015; 39: 322–30.
94. Keevil VL, Mazzuin Razali R, Chin AV, Jameson K, Aihie Sayer A, Roberts H. Grip strength in a cohort of older medical inpatients in Malaysia: a pilot study to describe the range, determinants and association with length of hospital stay. *Arch Gerontol Ger* 2013; 56: 155–9.
95. Roberts HC, Syddall HE, Sparkes J *et al*. Grip strength and its determinants among older people in different healthcare settings. *Age Ageing* 2014; 43: 241–6.

Received 24 July 2015; accepted in revised form 21 October 2015

*Age and Ageing* 2016; **45**: 216–227  
doi: 10.1093/ageing/afv193  
Published electronically 6 January 2016

© The Author 2016. Published by Oxford University Press on behalf of the British Geriatrics Society.  
All rights reserved. For Permissions, please email: journals.permissions@oup.com

# A systematic review and meta-analysis of interventions designed to prevent or stop elder maltreatment

LIAT AYALON, SAGIT LEV, OHAD GREEN, UZIEL NEVO

Louis and Gabi Weisfeld School of Social Work, Bar Ilan University, Ramat Gan, Israel

Address correspondence to: L. Ayalon. Tel: (+972) 3 5317941. Email: liat.ayalon@biu.ac.il

## Abstract

**Background:** elder maltreatment is a major risk for older adults' mental health, quality of life, health, institutionalisation and even mortality.

**Objectives:** to perform a systematic review and meta-analysis of interventions designed to prevent or stop elder abuse.

**Methods:** Studies that were posted between January 2000 and December 2014, written in English, specifically designed to prevent or stop elder maltreatment were included.

**Results:** overall, 24 studies (and four records reporting on the same participants) were kept for the systematic review and the meta-analysis. Studies were broadly grouped into three main categories: (i) interventions designed to improve the ability of professionals to detect or stop elder maltreatment ( $n = 2$ ), (ii) interventions that target older adults who experience elder maltreatment ( $n = 3$ ) and (iii) interventions that target caregivers who maltreat older adults ( $n = 19$ ). Of the latter category, one study targeted family caregivers, five targeted psychological abuse among paid carers and the remaining studies targeted restraint use. The pooled effect of randomised controlled trials (RCTs)/cluster-RCTs that targeted restraint use was significant, supporting
